1 Comparative Tn-Seq reveals common daptomycin resistance determinants in  
2 *Staphylococcus aureus* despite strain-dependent differences in essentiality of shared  
3 cell envelope genes  
4  
5

6 Kathryn A. Coe<sup>1¶</sup>, Wonsik Lee<sup>1,2¶</sup>, Gloria Komazin-Meredith<sup>3</sup>, Timothy C. Meredith<sup>1,3\*</sup>,  
7 Yonatan H. Grad<sup>4,5\*</sup>, Suzanne Walker<sup>1,6\*</sup>  
8  
9

10 <sup>1</sup> Department of Microbiology, Harvard Medical School, Boston, Massachusetts, United  
11 States  
12

13 <sup>2</sup> School of Pharmacy, Sungkyunkwan University, Suwon, Republic of Korea  
14

15 <sup>3</sup> Department of Biochemistry and Molecular Biology, Pennsylvania State University,  
16 University Park, Pennsylvania, USA  
17

18 <sup>4</sup> Department of Immunology and Infectious Diseases, Harvard T.H. Chan School of  
19 Public Health, Boston, Massachusetts, USA  
20

21 <sup>5</sup> Division of Infectious Diseases, Brigham and Women's Hospital, Harvard Medical  
22 School, Boston, Massachusetts, USA  
23

24 <sup>6</sup> Department of Chemistry and Chemical Biology, Harvard University, Cambridge,  
25 Massachusetts, United States  
26

27

28 \* Corresponding author  
29

30 Email: [suzanne\\_walker@hms.harvard.edu](mailto:suzanne_walker@hms.harvard.edu) (SW), [txm50@psu.edu](mailto:txm50@psu.edu) (TCM),  
31 [ygrad@hsph.harvard.edu](mailto:ygrad@hsph.harvard.edu) (YHG)  
32  
33

34 ¶These authors contributed equally to this work.

35 **Abstract**

36

37       Antibiotic-resistant *Staphylococcus aureus* remains a leading cause of antibiotic  
38 resistance-associated mortality in the United States. Given the reality of multi-drug  
39 resistant infections, it is imperative that we establish and maintain a pipeline of new  
40 compounds to replace or supplement our current antibiotics. A first step towards this  
41 goal is to prioritize targets by identifying the genes most consistently required for  
42 survival across the *S. aureus* phylogeny. Here we report the first direct comparison of  
43 gene essentiality across multiple strains of *S. aureus* via transposon sequencing. We  
44 show that mutant fitness varies by strain in key pathways, underscoring the importance  
45 of using more than one strain to differentiate between core and strain-dependent  
46 essential genes. Despite baseline differences in gene importance, several pathways,  
47 including the lipoteichoic acid pathway, become consistently essential under  
48 daptomycin exposure, suggesting core vulnerabilities that can be exploited to  
49 resensitize daptomycin-nonsusceptible isolates. We also demonstrate the merit of using  
50 transposons with outward-facing promoters capable of overexpressing nearby genes for  
51 identifying clinically-relevant gain-of-function resistance mechanisms. Together, the  
52 daptomycin vulnerabilities and resistance mechanisms support a mode of action with  
53 wide-ranging effects on the cell envelope and cell division. This work adds to a growing  
54 body of literature demonstrating the nuanced insights gained by comparing Tn-Seq  
55 results across multiple bacterial strains.

56

57

## 58 **Author summary**

59

60 Antibiotic-resistant *Staphylococcus aureus* kills thousands of people every year  
61 in the United States alone. To stay ahead of the looming threat of multidrug-resistant  
62 infections, we must continue to develop new antibiotics and find ways of making our  
63 current repertoire of antibiotics more effective, including by finding pairs of compounds  
64 that perform best when administered together. In the age of next-generation  
65 sequencing, we can now use transposon sequencing to find potential targets for new  
66 antibiotics on a genome-wide scale, identified as either essential genes or genes that  
67 become essential in the presence of an antibiotic. In this work, we created a  
68 compendium of genes that are essential across a range of *S. aureus* strains, as well as  
69 those that are essential in the presence of the antibiotic daptomycin. The results will be  
70 a resource for researchers working to develop the next generation of antibiotic  
71 therapies.

72

## 73 **Introduction**

74

75 Every year in the United States over two million people acquire an antibiotic-  
76 resistant infection, and over 23,000 people die from those infections [1]. More people  
77 die of infections caused by antibiotic-resistant *Staphylococcus aureus* than any other  
78 resistant pathogen [2]. The primary antibiotic class used to treat *S. aureus* infections is  
79 the  $\beta$ -lactams, but over 50% of *S. aureus* infections in the United States are resistant to  
80 methicillin and other  $\beta$ -lactamase-impervious  $\beta$ -lactams [3, 4]. These  $\beta$ -lactam-resistant

81 strains are termed methicillin-resistant *S. aureus* (MRSA). Antibiotics such as  
82 vancomycin, linezolid, and daptomycin are used to treat MRSA infections but are  
83 ineffective in an increasing number of cases [5-7]. We need a pipeline of new  
84 compounds that can either kill *S. aureus* outright or resensitize antibiotic-resistant  
85 isolates, regardless of genetic background. Thousands of *S. aureus* isolates have been  
86 sequenced, revealing substantial differences in gene content [8, 9], but the functional  
87 variability across the phylogeny has yet to be systematically investigated. Transposon  
88 sequencing (Tn-Seq) can be used to attribute phenotypes to genes on a genome-wide  
89 scale, enabling researchers to characterize the full essential genome of a bacterial  
90 strain in a single experiment [10, 11]. Here we describe the first multi-strain Tn-Seq  
91 study in *S. aureus*, using comparisons of results from favorable growth conditions to  
92 define baseline variation in genetic dependencies and then exposing the libraries to  
93 daptomycin to probe the factors that modulate daptomycin susceptibility.

94         Several transposon mutagenesis studies have formerly analyzed the essential  
95 genes in individual *S. aureus* strains [12-17]. Aside from one study conducted in a  
96 livestock-associated strain, all the studies involved one clonal complex, CC8, and most  
97 emphasized laboratory-adapted strains. Only two methicillin-resistant strains have been  
98 examined. Moreover, the conditions for library creation and analysis differed  
99 substantially. With these limitations, it is difficult to assess the congruence of gene  
100 essentiality across *S. aureus* strains. A recent comparative Tn-Seq analysis of  
101 *Mycobacterium tuberculosis* showed strain-to-strain differences in gene essentiality,  
102 with implications for antibiotic targets and acquisition of resistance; this work highlighted

103 the importance of carrying out functional genomics studies of important pathogens in  
104 multiple strains using the same methodology [18].

105 Here we have used our previously reported platform for creating transposon  
106 libraries in *S. aureus* to make high-density transposon libraries in five strains [17].  
107 These libraries comprise six sub-libraries, each made using a different transposon  
108 construct. Several constructs contain outward-facing promoters, which minimize polar  
109 effects within polycistronic operons. In addition, under some conditions, insertions of  
110 outward-facing promoter constructs can upregulate nearby genes to provide a distinct  
111 fitness advantage that is mechanistically informative [19]. The five *S. aureus* strains we  
112 chose represent three clonal complexes (Fig 1B), including two MRSA/methicillin-  
113 sensitive (MSSA) pairs from the same sequence type. MW2, from sequence type 1  
114 (ST1), was the first lineage of community-acquired MRSA infections reported in the  
115 United States [20-22]. MSSA476, a representative of a United Kingdom community-  
116 acquired MSSA lineage, is likewise from ST1 [23]. We have chosen USA300-TCH1516  
117 to represent the hypervirulent USA300 lineage from ST8, which has become the most  
118 common community-acquired MRSA lineage in the United States [21, 24, 25]. The  
119 commonly used MSSA lab strain HG003 is also ST8. To capture a larger scope of the  
120 *S. aureus* phylogeny, we also included MRSA252, an ST36 hospital-acquired MRSA  
121 strain predominantly found in Europe that has attracted attention for its unusually large  
122 accessory genome [23].

123 We found 200 genes that are essential in all five strains and thus represent the  
124 core essential genome. We also identified genes that were uniquely essential in a given  
125 strain, as well as genes and pathways present in all five strains but essential in a

126 subset. These cases imply that strain-specific distal genetic determinants, whether  
127 allelic in nature or horizontally acquired as with  $\beta$ -lactam resistance cassettes, can  
128 profoundly reshape the role of even core pathways. The lipoteichoic acid (LTA) pathway  
129 is one example of a conserved pathway that is differentially important across *S. aureus*  
130 strains.

131 We probed to what extent the variable genetic dependencies evident in the  
132 essential gene analysis shaped mutant fitness upon exposure to daptomycin, an  
133 antibiotic used for *S. aureus* infections. Patients who cannot tolerate  $\beta$ -lactam or  
134 vancomycin treatment, or who have resistant infections, are commonly treated with  
135 daptomycin. Although still rare, daptomycin nonsusceptibility is on the rise [6]. It might  
136 be possible to overcome infections that are resistant to daptomycin by co-administering  
137 a compound that targets an intrinsic resistance factor found to be universally important  
138 in withstanding daptomycin stress. A recent study comparing two *Streptococcus*  
139 *pneumoniae* strains found major differences in factors that influenced daptomycin  
140 susceptibility, raising questions about the prevalence of universally conserved  
141 daptomycin intrinsic resistance factors in *S. aureus* [26]. Nevertheless, we identified  
142 daptomycin intrinsic resistance factors conserved in all strains and demonstrated that  
143 even pathways that appear variably essential among strains under normal growth  
144 conditions can become essential in all upon exposure to daptomycin, illuminating a path  
145 forward for combatting daptomycin resistance in *S. aureus*.

146

## 147 **Results**

148

149 **Creation of high-density *S. aureus* transposon libraries with both positive and**  
150 **negative modulation of gene expression**

151

152 To characterize the functional diversity of *S. aureus*, we generated transposon  
153 libraries with similar coverage in five strains (HG003, USA300-TCH1516, MSSA476,  
154 MW2, and MRSA252). For each strain, we used our phage-based transposition method  
155 to make six sub-libraries using different transposon constructs (Fig 1A) [17]. One  
156 transposon construct contained an erythromycin resistance gene driven by its own  
157 promoter ( $P_{erm}$ ) and followed by a transcriptional terminator; another lacked the  
158 transcriptional terminator to allow readthrough from the  $P_{erm}$  promoter; three constructs  
159 contained the transcriptional terminator, but included an additional, outward-facing  
160 promoter that varied in strength; and the sixth construct lacked the transcriptional  
161 terminator and had an added outward-facing promoter, allowing for bidirectional  
162 transcription. The sub-libraries were made separately and then pooled, with unique  
163 barcodes in each transposon construct to enable disambiguation. These high-density  
164 composite libraries often contained transposon insertions from multiple constructs at a  
165 given TA insertion site. The constructs containing outward-facing promoters minimized  
166 polar effects by allowing expression of downstream genes when an operon was  
167 disrupted. Under some conditions, they also provided supplementary fitness  
168 information. For example, under antibiotic exposure, an upregulated gene conferring a  
169 growth advantage presented in the data as a strand-biased enrichment of promoter-  
170 containing transposon insertions upstream of the gene. These “upregulation signatures”

171 can identify molecular targets or mechanisms of resistance (Fig 1A, yellow gene;  
172 Methods).

173 Tn-Seq analysis showed that pooling the six transposon sub-libraries afforded  
174 libraries with high coverage in every genome (Fig 1B). Although there was a three-fold  
175 difference in unique insertions, counting insertions from each sub-library as distinct,  
176 between the library with the fewest insertions (MW2) and the library with the most  
177 insertions (USA300-TCH1516), approximately 90% of the genes in each genome had  
178 high coverage of TA dinucleotide insertion sites. This gave us confidence that we could  
179 obtain a reliable estimate of gene essentiality differences across the strains.

180

### 181 **Essential gene analysis reveals unexpected differences between strains**

182

183 We performed Tn-Seq analysis on the five transposon libraries to identify  
184 essential genes in each strain. For the purposes of this study, we defined an essential  
185 gene as one whose loss precluded survival in competition with a heterogeneous  
186 bacterial population. We categorized genes as essential, non-essential, or  
187 indeterminate based on TA insertion site coverage and sequencing reads (S1 Table).  
188 Most essential genes were essential in all five strains. These 200 genes represent the  
189 core essential genome of *S. aureus* (S1 Fig, S2 Table), with an additional 11 that were  
190 required for at least the three MRSA strains (Fig 2A). Gene ontology overrepresentation  
191 analysis showed that the ubiquitously essential genes were enriched in DNA, RNA, and  
192 protein metabolic processes (S3 Table). Phospholipid and monosaccharide synthesis  
193 were also enriched pathways, reflecting the importance of fatty acids and other cell



194 envelope precursors. Hypothetical genes were significantly underrepresented among  
195 the ubiquitously essential genes but dominated the group of essential genes that were  
196 only present in a subset of the genomes. Only two such genes were annotated: the  
197 antitoxin gene *pezA* found only in MW2 and a phage repressor found in HG003, MW2,  
198 and MSSA476.

199         Among annotated genes present in all five strains, there were notable  
200 differences in essentiality. Strains of the same sequence type displayed as much  
201 variability in gene essentiality as strains from different sequence types (S1 Fig),  
202 suggesting it may not be possible to draw general conclusions about a clonal complex  
203 from a functional genomics analysis of one member. Variably essential genes were  
204 found in multiple pathways. For example, the uniquely essential genes in MRSA252  
205 included *sbcD*, which is homologous to an *E. coli* gene encoding a DNA hairpin  
206 cleavage enzyme [27, 28]; *sagB*, which encodes a  $\beta$ -N-acetylglucosaminidase [29]; and  
207 *gdpP*, which hydrolyzes the bacterial second messenger cyclic-di-AMP [30]. It is  
208 important to emphasize that essentiality in a Tn-Seq analysis does not imply that  
209 individual knockouts are not viable; however, it does suggest that there are substantial  
210 differences in the fitness of mutants across strains and that it is worth considering the  
211 broader genomic context in evaluating the cellular roles of genes.

212         We expected pathways involved in constructing the cell envelope to be equally  
213 essential for all strains, given the importance of the cell envelope in protecting the cell  
214 from outside stressors. We were therefore surprised to find essentiality differences  
215 within the LTA biosynthesis pathway. LTAs are long glycerol or ribitol phosphate  
216 polymers anchored in the membrane of Gram-positive bacteria. In *S. aureus*, LTAs are

217 important in cell division, autolysin regulation, and virulence, among other processes  
218 [31]. The LTA pathway consists of five genes: *pgcA*, *gtaB*, *ugtP*, *ltaA*, and *ltaS* (Fig 2B).  
219 The first three genes encode proteins involved in the biosynthesis of diglucosyl-  
220 diacylglycerol (Glc<sub>2</sub>DAG), the membrane anchor on which LTAs are assembled.  
221 Glc<sub>2</sub>DAG is made inside the cell and flipped to the cell surface by *LtaA*. The LTA  
222 synthase, *LtaS*, then assembles the polymer by sequential transfer of phosphoglycerol  
223 units from phosphatidylglycerol to Glc<sub>2</sub>DAG. LTAs can then be further modified on the  
224 extracellular surface by D-alanine substitutions and N-acetyl glucosamine residues [32,  
225 33]. If Glc<sub>2</sub>DAG is not available due to deletion of an upstream gene, *LtaS* can  
226 synthesize LTAs on the alternative membrane anchor phosphatidylglycerol. The four  
227 genes upstream of *ltaS* were previously found to be nonessential for *S. aureus* viability  
228 [34-36], but *ltaS* mutants were reported to be nonviable except at low temperature and  
229 under osmotically-stabilizing conditions unless suppressors were acquired [37-40]. Our  
230 Tn-Seq analysis showed, however, that mutant fitness within the LTA pathway varied  
231 considerably by strain (Fig 2C). The *ltaA* gene was expendable in all strains, but the  
232 three genes responsible for synthesis of the Glc<sub>2</sub>DAG anchor, *pgcA*, *gtaB*, and *ugtP*  
233 (*ypfP*), were uniquely essential by Tn-Seq analysis for USA300-TCH1516 (Fig 3A, S2  
234 Fig). Conversely, *ltaS* was unexpectedly dispensable in MW2 and MSSA476 (Fig 3C,  
235 S2 Fig).

236 We tested individual deletion mutants in the LTA pathway to confirm the Tn-Seq  
237 results. We were able to delete *ugtP* from USA300-TCH1516, consistent with results in  
238 other USA300 strain backgrounds, but a spot dilution assay showed that the mutant  
239 was less fit than the corresponding mutant in MW2 (Fig 3B). We also found that *ltaS* is

240 dispensable in MW2, but essential in other strains (Fig 4C). Although the MW2 $\Delta$ *ltaS*  
241 strain was more temperature-sensitive than MW2 wildtype, it grew on plates even at  
242 37°C (S3 Fig). Because lethality due to *ltaS* deletion can be suppressed by deletion of  
243 *gdpP*, *clpX*, and *sgtB* [37-39], we sequenced the transposon library parent strain but  
244 found no nonsynonymous SNPs in *sgtB* or *gdpP* and only one nonsynonymous SNP in  
245 *clpX*. The amino acid difference in ClpX is unlikely to explain the observed phenotype,  
246 as it is located in an unstructured region of the protein and the amino acid is not strictly  
247 conserved in the *S. aureus* phylogeny. Moreover, we did not find any evidence for a  
248 duplication of *ltaS* in MW2 and confirmed that the MW2 $\Delta$ *ltaS* mutant does not produce  
249 LTAs (Fig 3D). The explanation for why LtaS is nonessential in MW2 must lie elsewhere  
250 in the genome and will need to be investigated further.

251

## 252 ***S. aureus* strains share key daptomycin resistance factors**

253

254 While antibiotics targeting essential genes are invaluable, it may also be  
255 advantageous to have compounds that resensitize bacteria to existing antibiotics,  
256 though they may not be antimicrobial *in vitro* on their own. To find targets for such  
257 compounds, we chose daptomycin as a case study. Daptomycin is a calcium-dependent  
258 lipopeptide antibiotic frequently used to treat *S. aureus* infections. Although its  
259 mechanism of action is not completely clear, it has been shown to insert into Gram-  
260 positive bacterial cell membranes and change membrane curvature, mislocalize cell  
261 division and cell wall synthesis proteins, depolarize the membrane, and ultimately kill  
262 the cell [41-46]. The majority of *S. aureus* infections remain susceptible to daptomycin,

263 but there have been steady reports of daptomycin nonsusceptibility, making it  
264 imperative to identify intrinsic resistance factors that can be targeted to restore  
265 susceptibility [47].

266 We grew the five *S. aureus* transposon libraries in the presence and absence of  
267 daptomycin in both cation-adjusted Mueller Hinton broth (MHBII) and Roswell Park  
268 Memorial Institute supplemented with 10% lysogeny broth (RPMI+LB), as we wanted to  
269 ensure the results were not dependent on a particular medium. We found substantial  
270 overlap in the significantly depleted and upregulated genes in the two media, so the  
271 results were considered as a union of the two conditions. For every strain, there were  
272 more hits shared with at least one other strain than there were hits unique to that strain  
273 (Fig 4A, S4 and S5 Table). Genes that were substantially depleted (>10-fold) in three or  
274 more strains are shown in Fig 4B. Several vulnerabilities were above or very close to  
275 the 10-fold cutoff in all five strains.

276 Many of the shared vulnerabilities to daptomycin are in genes related to the cell  
277 envelope. These include *graRS/vraFG*, encoding the multi-component signaling system  
278 that regulates cell envelope processes [48-50]; *arlR*, encoding a regulator of virulence  
279 genes [51, 52]; *murA1*, encoding an enzyme that catalyzes the first step in  
280 peptidoglycan biosynthesis [53, 54]; *alr1*, one of two genes encoding an alanine  
281 racemase that supplies D-alanine for cell wall synthesis [55]; *mprF*, encoding a  
282 phosphatidylglycerol lysyltransferase that modifies membrane charge [56]; and *ItaA*,  
283 encoding the Glc<sub>2</sub>DAG flippase gene in the LTA pathway [34]. The earlier LTA pathway  
284 genes, *gtaB*, *pgcA*, and *ugtP*, were also significantly depleted in MW2, with the latter  
285 two also depleted in HG003 (Fig 5A). In addition, we identified three depleted cell

286 division regulators, *gpsB*, *ezrA*, and *noc* (Figs 4B and 4C) [57-59]. A number of these  
287 depleted genes have been previously associated with daptomycin susceptibility,  
288 including *mprF* [60, 61], *graRS/vraFG* [49, 62], and *ezrA* [63], but some that were  
289 substantially depleted in all five strains have not been connected to daptomycin,  
290 including *gpsB* and *ItaA*. We confirmed that deletion of *ItaA* sensitizes HG003, MW2,  
291 and USA300-TCH1516 to daptomycin and that the sensitivity can be reversed by *ItaA*  
292 complementation (Fig 5B, S4 Fig). Therefore, Glc<sub>2</sub>DAG-LTA in the cell membrane  
293 contributes to *S. aureus* survival in the presence of daptomycin, and it may be possible  
294 to exploit this observation to overcome daptomycin nonsusceptibility or limit its  
295 development.

296         Just as there were more shared than unique depleted genes for each strain,  
297 there were more shared than unique upregulated genes (Fig 4A). The outward-facing  
298 promoters in several of our transposon constructs can upregulate downstream genes,  
299 allowing us to identify genes that confer a fitness advantage when upregulated. They  
300 are detected by strand-biased read enrichments in promoter-containing constructs, and  
301 we have previously confirmed that these strand-biased read enrichments, or  
302 upregulation signatures, do reflect increased expression of proximal genes [19]. Often  
303 the genes identified this way are the targets of the antibiotic itself or reveal gain-of-  
304 function resistance mechanisms. Standard transposon libraries cannot identify gain-of-  
305 function resistance mechanisms, although loss-of-function resistance mechanisms can  
306 be identified through intragenic read enrichments. Here we found that the genes  
307 enriched in reads upon daptomycin exposure belonged to a wide assortment of cellular  
308 processes and we could not discern a pattern amongst them (S6 Table).

309 Many of the genes for which we identified upregulation signatures in multiple  
310 strains were previously implicated in daptomycin resistance in *S. aureus* (Table 1).  
311 Daptomycin nonsusceptibility normally develops through the acquisition of multiple  
312 independent mutations that result in changes to the cell envelope [47], and many of the  
313 mutations are thought to be gain-of-function mutations that result in increased activity.  
314 For example, mutations in *mprF* have been selected *in vitro* and in the clinic and are  
315 thought to increase lysyl phosphatidylglycerol in the outer leaflet of the membrane [64].  
316 Other gain-of-function resistance mechanisms identified in our Tn-Seq libraries include  
317 *cls2*, one of two cardiolipin synthases in *S. aureus* [65]; the staphyloxanthin  
318 biosynthesis gene *crtM* [66]; and two signaling systems, *graRS* and *walKR* (*yycFG*) [62,  
319 67]. Some of these resistance mechanisms have been reported for daptomycin  
320 resistance in other bacteria as well [68]. These hits affirm the utility of upregulation  
321 signatures for identifying clinically-relevant mechanisms of resistance. The gene *murA2*,  
322 whose function was identified as important for withstanding daptomycin exposure in the  
323 depletion analysis, also had upregulation signatures in several strains. The importance  
324 of MurA activity identified in this study – both through the depletion analysis and the  
325 upregulation analysis – is consistent with recent studies showing that a combination of  
326 daptomycin and fosfomycin is significantly more effective at curing MRSA bacteremia  
327 than daptomycin alone, leading to an ongoing phase III clinical trial [69-71]. One caveat  
328 of the upregulating transposons is that they may have distal effects, upregulating both  
329 the most proximal gene and other downstream genes, especially within operons.  
330 Individual mutants need to be tested to confirm that the proximal gene is most  
331 responsible for the phenotype. For example, we identified an upregulation signature for

332 *ugtP* in USA300-TCH1516 and in MSSA476. The *ugtP* gene is upstream of *ltaA* in an  
 333 operon, so it is unclear whether upregulating *ugtP* on its own would recapitulate the  
 334 transposon-induced fitness advantage or whether *ltaA* upregulation is also necessary.  
 335 Regardless of whether upregulation of one or both genes in the operon drives the  
 336 fitness advantage, the result is consistent with findings from the depletion analysis that  
 337 Glc<sub>2</sub>DAG-LTA is important for withstanding daptomycin stress.

338

339 **Table 1. Upregulation signatures identify genes previously linked to reduced**  
 340 **susceptibility to daptomycin.**

| Gene         | Function                                                | HG003 | USA300 | MSSA476 | MW2 | MRSA252 |
|--------------|---------------------------------------------------------|-------|--------|---------|-----|---------|
| <i>cls2</i>  | Cardiolipin synthesis                                   |       |        |         |     |         |
| <i>crtM</i>  | Staphyloxanthin synthesis                               |       |        |         |     |         |
| <i>graRS</i> | Cell wall stress response                               |       |        |         |     |         |
| <i>mprF</i>  | Lysyl phosphatidylglycerol synthesis                    |       |        |         |     |         |
| <i>murA1</i> | Rate-limiting step in peptidoglycan precursor synthesis |       |        |         |     |         |
| <i>murA2</i> |                                                         |       |        |         |     |         |
| <i>walKR</i> | Cell wall stress response                               |       |        |         |     |         |
| 00969        | Unknown                                                 |       |        |         |     |         |
| 02149        | Unknown                                                 |       |        |         |     |         |

341 Only showing genes with upregulation signatures in at least two strains. Strains sharing  
 342 upregulation signature indicated with blue shading. Upregulation and/or suspected gain-  
 343 of-function SNPs in all of these genes were previously found to confer a survival  
 344 advantage in the presence of daptomycin. Hypothetical genes are listed according to  
 345 their NCTC 8325 locus tag numbers.

346

347 Upregulation signatures were found upstream of the genes *SAOUHSC\_02149*  
348 and *SAOUHSC\_00969* in all five strains. These genes each encode a small protein of  
349 unknown function with a single transmembrane helix. We previously identified both as  
350 daptomycin resistance factors in a Tn-Seq study of a single *S. aureus* strain and  
351 confirmed that upregulation confers resistance while inactivation increases susceptibility  
352 to daptomycin [19]. The observation that these genes are important for daptomycin  
353 resistance in all five *S. aureus* strains suggests some effort should be devoted to  
354 evaluating the physiological roles of their encoded products.

355

## 356 **Discussion**

357

358 Declining sequencing costs and efficient transposon mutagenesis methodologies  
359 enable investigation of the genetic basis of phenotypes on a large scale. Tn-Seq  
360 experiments are typically conducted in a single strain that is considered representative,  
361 and it is assumed that results from that strain can be extrapolated to other members of  
362 the species. Recent studies have challenged this notion, demonstrating clear strain-  
363 dependent gene requirements in *Mycobacterium tuberculosis*, *Streptococcus*  
364 *pneumoniae*, and *Pseudomonas aeruginosa* [18, 26, 72].

365 In the present study, we reveal how complicated the concept of gene essentiality  
366 can be. We found that the LTA pathway, which has always been presumed to be  
367 essential for all *S. aureus* strains, was variably essential under normal growth  
368 conditions, ranging from required in USA300-TCH1516 to expendable in MW2. We  
369 suspect that intracellular Glc<sub>2</sub>DAG has an unidentified function that USA300-TCH1516



370 depends upon for survival because the Glc<sub>2</sub>DAG biosynthesis genes (*pgcA*, *gtaB*, and  
371 *ugtP*) contained almost no transposon reads, whereas *ItaA*, which encodes the flippase  
372 responsible for translocating Glc<sub>2</sub>DAG to the cell surface, contained many insertions.  
373 The central role of Glc<sub>2</sub>DAG in the viability of USA300-TCH1516 may provide a tool to  
374 interrogate what other roles the molecule has in the cell. Likewise, having a strain like  
375 MW2 that can ostensibly survive without LTAs provides new opportunities for  
376 characterizing the functions of LTAs, as future investigations can interrogate what  
377 wildtype MW2 can do that an *ItaS* knockout cannot. Whether strains that can survive  
378 without LTA *in vitro* – due to the presence of known suppressors or to other  
379 uncharacterized genetic background differences – can survive in the more challenging  
380 environment of an animal infection needs to be assessed. LTAs are associated with  
381 virulence and it has been shown in the *S. aureus* Newman strain that *ItaA* is required for  
382 fitness in a mouse abscess model [34]. The results here also show that the LTA  
383 pathway becomes universally required in the presence of daptomycin; therefore, LTA  
384 pathway inhibitors may resensitize nonsusceptible isolates to daptomycin even if they  
385 cannot kill the cells on their own.

386 We have also demonstrated an improved method for identifying gain-of-function  
387 resistance mechanisms via Tn-Seq. The upregulation signatures that we found under  
388 daptomycin exposure using our transposons with outward-facing promoters largely  
389 echoed the depletion hits. In other words, if removing a gene sensitizes a bacterium to  
390 an antibiotic, upregulating that gene is often protective. For daptomycin, these intrinsic  
391 resistance factors were predominantly cell envelope, cell division, and stress response  
392 system genes. Although a standard Tn-Seq library can identify intrinsic resistance

393 factors through sensitization of knockouts, sensitization readouts are limited to only  
394 looking at nonessential genes where a decline in insertions can be detected. The  
395 upregulation signatures, on the other hand, are indifferent to the essentiality of the  
396 gene. For example, *ugtP* was upregulated under daptomycin stress in USA300-  
397 TCH1516 even though it was found to be essential in that strain, and *walR*, an essential  
398 multicomponent signaling system gene, was upregulated in multiple strains. As  
399 validation for the approach, most of the genes that had upregulation signatures have  
400 been previously reported as suspected gain-of-function resistance mechanisms for  
401 daptomycin.

402 In summary, our comparison of Tn-Seq data across multiple strains provided a  
403 more nuanced illustration of *S. aureus* genetic dependencies than we could have  
404 attained using a single strain. The comparative data provide the most comprehensive  
405 list of core essential genes in *S. aureus* to date and have identified myriad strain-  
406 dependent essential genes. The strain-to-strain gene essentiality differences under  
407 normal growth conditions provide a basis to more deeply interrogate *S. aureus* biology.  
408 Meanwhile, those factors that were universally essential may be useful targets for future  
409 antibiotic development. Under daptomycin stress the commonalities between the strains  
410 likewise proved valuable, as they give us a means to prioritize targets for the  
411 development of synergistic compounds. Moreover, Tn-Seq results can be used to  
412 complement findings from other systems biology approaches [9, 73]. As sequencing  
413 continues to become more affordable, we envision performing Tn-Seq in multiple strains  
414 will become routine and will lead to a more comprehensive understanding of the scope  
415 of bacterial phenotypic diversity.

416

## 417 **Materials and methods**

418

### 419 **Materials, bacterial strains, plasmids, and oligonucleotides**

420

421 All reagents were purchased from Sigma-Aldrich unless otherwise indicated.

422 Bacterial culture media were purchased from BD Sciences. Restriction enzymes and

423 enzymes for Tn-seq preparation were purchased from New England Biolabs.

424 Oligonucleotides and primers were purchased from Integrated DNA Technologies. DNA

425 concentrations were measured using a NanoDrop One Microvolume UV-Vis

426 Spectrophotometer (Thermo Scientific). DNA sequencing was performed by Eton

427 Bioscience unless otherwise noted. KOD Hotstart DNA polymerase (Novagen) was

428 used for PCR amplification. *E. coli* strains were grown with shaking at 37°C in lysogeny

429 broth (LB) or on LB plates. *S. aureus* strains were grown at 30°C in tryptic soy broth

430 (TSB) shaking or on TSB agar plates unless otherwise noted. For *S. aureus* strains,

431 compounds for selection or gene induction were used at the following concentrations: 5

432 µg/mL chloramphenicol and erythromycin; 50 µg/mL kanamycin and neomycin; or 2.5

433 µg/mL tetracycline. For *E. coli* strains, 100 µg/mL carbenicillin was used for selection.

434 The bacterial strains, plasmids, and oligonucleotide primers used in this study are

435 summarized in S7 Table.

436

### 437 **Transposon library construction**

438

439 Construction of the transposon library in the laboratory *S. aureus* strain HG003  
440 has been described [17]. A similar strategy was used to make libraries in other *S.*  
441 *aureus* genetic backgrounds after deleting non-compatible DNA restriction systems and  
442 endogenous antibiotic resistance genes that would interfere with transposon library  
443 construction. In the community acquired *S. aureus* MW2 and MSSA476 strains, the  
444 clonal complex CC1 *hsdR* Type I restriction system in each background was first  
445 deleted using the temperature sensitive shuttle vector pKFC with ~1 kb DNA homology  
446 flanking arms. A second restriction system unique to MSSA476 was deleted in a  
447 subsequent round using pKFC to generate the transposon library host. Libraries were  
448 constructed in the *S. aureus* community acquired strain USA300-TCH1516 by first  
449 curing the endogenous plasmid pUSA300HOUMR through destabilizing replication via  
450 integration of pTM283. Cointegrated pUSA300HOUMR-pTM283 was passaged at 30°C  
451 for two rounds of outgrowth in 10 mL of TSB media before streaking to single colonies.  
452 Colonies exhibiting kanamycin and erythromycin sensitivity (encoded on  
453 pUSA300HOUMR) were further checked by PCR to confirm loss of plasmid. The  
454 resulting strain, TM283, was used as host for transposon library construction. A  
455 transposon library of the hospital-acquired, methicillin-resistant *S. aureus* MSRA252  
456 strain was made by first converting the *hsdR* (SAR0196) Type I restriction gene deletion  
457 shuttle vector pGKM305 into a high frequency transduction vector by adding a  $\phi$ 11 DNA  
458 homology region (primers GKM422-423) into the Sfol site to make pGKM306. The  
459 plasmid was electroporated into RN4220 and transduced into wildtype MRSA252 using  
460  $\phi$ 11-FRT with temperature permissive selection at 30°C [17]. The SAR0196 gene was  
461 then deleted as described above. Both copies of the endogenous duplicated

462 erythromycin resistance gene (SAR0050 and SAR1735) were likewise deleted in two  
463 rounds using pKFC\_SAR0050, except plasmids were directly electroporated into the  
464 restriction negative parent strain GKM361. Due to endogenous aminoglycoside  
465 resistance, the transposase expressing plasmid pORF5 Tnp+ was converted into  
466 chloramphenicol resistant plasmids to enable selection in strain TXM369 and library  
467 construction.

468

### 469 **Transposon sequencing**

470

471 To identify the essential genes in each of the *S. aureus* strains (HG003, USA300-  
472 TCH1516, MSSA476, MW2, and MRSA252), library aliquots were thawed and diluted to  
473 an OD<sub>600</sub> between 0.2 and 0.3 in 10 mL of MHBII in duplicate. The cultures were then  
474 incubated shaking at 30°C until they reached an OD<sub>600</sub> of approximately 0.4, roughly  
475 1.5-1.75 hours. The cells were pelleted, and the DNA was extracted and prepared for  
476 Tn-Seq as previously described [17]. Samples were then submitted to either the  
477 Harvard Biopolymers Facility or the Tufts University Core Facility for sequencing on a  
478 HiSeq 2500 instrument.

479 To identify genes affected by daptomycin exposure, transposon library aliquots  
480 for the six strains were inoculated in either MHBII or RPMI+LB. The cultures were  
481 incubated for 1.5 hours at 30°C in a shaking incubator as described above. The cultures  
482 were diluted to OD<sub>600</sub> 0.005 in either 2 mL MHBII or RPMI+LB containing a series of  
483 daptomycin concentrations (µg/mL): 0, 0.12, 0.25, 0.5, and 1. The cultures were then  
484 incubated at 37°C in a shaking incubator and their ODs were monitored using a

485 Genesys 20 spectrophotometer (Thermo Scientific). The 2 mL cultures were harvested  
486 by centrifugation when the OD<sub>600</sub> reached 1.5. The cell pellets were stored at -80°C until  
487 processing for Tn-Seq. The genomic DNA was extracted and prepared as described  
488 previously [17]. Samples were submitted to the Tufts University Core Facility for  
489 sequencing on a HiSeq 2500 instrument.

490

#### 491 **Transposon sequencing data analysis**

492

493 Transposon sequencing data was split by transposon and sample, trimmed,  
494 filtered, and mapped using the Galaxy software suite as previously described [17, 19,  
495 74, 75]. A workflow for the processing is provided on GitHub. The resulting SAM files  
496 were converted into tab-delimited hop count files using Tufts Galaxy Tn-Seq software  
497 (<http://galaxy.med.tufts.edu/>) or custom python scripts, likewise provided on GitHub, and  
498 then converted further into IGV-formatted files, as previously described [17, 19].

499 Chromosome nucleotide FASTA files for NCTC 8325 (NC\_007795.1 - HG003  
500 parent strain, as the HG003 genome is not closed), USA300-TCH1516 (NC\_010079.1),  
501 MSSA476 (NC\_002953.3), MW2 (NC\_003929.1), and MRSA252 (NC\_002952.2) were  
502 downloaded from the NCBI genomes database. The genomes were reannotated via  
503 Prokka and the pangenome was aligned with Roary, splitting by homolog and using a  
504 90% ID cutoff [76, 77]. Roary group names were then adjusted based on common *S.*  
505 *aureus* pangenome gene names found on AureoWiki [78].

506 Genes in each strain were labeled as essential, non-essential, or uncertain using  
507 the TRANSIT software Gumbel method [79]. Only the transposon constructs with

508 transcriptional terminators were included (four of six transposon constructs). For each  
509 TRANSIT Gumbel run, data files for each transposon construct in both replicates (for a  
510 total of eight files) were submitted and the mean replicates parameter was chosen.  
511 Permutation tests with 20,000 permutations were then conducted between each pair of  
512 strains for each gene to determine whether differences in essentiality were significant,  
513 using the sum of the same data sets used in the Gumbel analysis. Data were  
514 normalized by average reads per TA site with reads (non-zero means normalization)  
515 and the p-values from each file pair were corrected for multiple hypothesis testing using  
516 the Benjamini-Hochberg method. A gene was considered significantly different between  
517 two strains if the q-value was less than 0.05. The list of genes essential for all five  
518 strains was then analyzed using the online gene ontology tool PANTHER version 13.1,  
519 comparing the NCTC 8325 locus tags for the essential genes to the *S. aureus* reference  
520 gene list and using default settings for the overrepresentation test [80].

521 Genes depleted or enriched under daptomycin stress were identified by  
522 normalizing the treated sample data by non-zero means and performing a Mann-  
523 Whitney U test for each gene. The p-values were then corrected for multiple hypothesis  
524 testing by the Benjamini-Hochberg method. A depleted gene was considered to be a hit  
525 if there were at least 100 reads in the control file, the q-value was less than 0.05, and  
526 the treated:control read ratio was less than 0.1. An enriched gene was considered to be  
527 a hit if there were at least 100 normalized reads in the treated file, the q-value was less  
528 than 0.05, and the read ratio was greater than ten. We then selected one representative  
529 daptomycin concentration for each strain in each medium, chosen to have a similar

530 selective pressure (Table 2). Specifically, the highest concentration file with twenty-five  
531 or fewer 10-fold depleted genes with a significant q-value was chosen.

532

533 **Table 2. Daptomycin samples included in the multi-strain comparison of depleted**  
534 **and upregulated genes.**

| Strain         | Medium  | Concentration (µg/mL) | Depleted Genes |
|----------------|---------|-----------------------|----------------|
| USA300-TCH1516 | RPMI+LB | 0.12                  | 8              |
| USA300-TCH1516 | MHBII   | 0.5                   | 12             |
| MW2            | RPMI+LB | 0.25                  | 18             |
| MW2            | MHBII   | 0.5                   | 8              |
| MSSA476        | RPMI+LB | 0.25                  | 7              |
| MSSA476        | MHBII   | 0.5                   | 8              |
| HG003          | RPMI+LB | 0.25                  | 9              |
| HG003          | MHBII   | 1                     | 25             |
| MRSA252        | RPMI+LB | 0.5                   | 19             |
| MRSA252        | MHBII   | 1                     | 18             |

535

536 Genes upregulated under daptomycin stress were identified by a bootstrapping  
537 approach. We defined the upstream region (UR) of a gene to be the 500 bp ahead of a  
538 gene, based on the 99<sup>th</sup> percentile of 5' untranslated regions of transcripts in *E. coli* [81].  
539 Only TA sites located in a UR that had at least one read in either the control or the  
540 treated data were included in the analysis. Read differences for each site were then  
541 calculated by subtracting the control data reads from the treated data reads. For each  
542 strand and for each gene, a distribution for the expected difference in UR reads  
543 between the treated sample and the control was created by counting the number of



544 qualifying TA sites in the UR (N) and generating 200,000 summed random samples of N  
545 read differences from across the genome. A one-sided p-value for each strand was  
546 calculated as the proportion of the null distribution values that was greater than the  
547 actual value for that gene, and a q-value was obtained using the Benjamini-Hochberg  
548 method. We defined an upregulation signature as any UR in which the q-value for the  
549 DNA strand matching the gene direction was less than 0.05, there was more than one  
550 TA site in the UR, and the opposing strand had a read difference less than the 90<sup>th</sup>  
551 percentile for all URs. Again, only those samples shown in Table 2 were included.

552

### 553 **Whole genome sequence comparisons**

554

555 To obtain the genomic sequences of the transposon library parent strains, the  
556 strains were cultured in MHBII at 37°C shaking overnight. The DNA was harvested  
557 using a Promega Wizard Genomic DNA purification kit and cleaned using a Zymo DNA  
558 Clean Up Kit. DNA was tagmented using the Illumina Nextera DNA Library Prep kit, but  
559 using 1/20<sup>th</sup> of the volume recommended by the manufacturer and starting DNA  
560 concentrations of 0.5, 0.75, 1, and 2 ng/μL. The tagged DNA fragments were then  
561 amplified via PCR. The PCR samples contained 11.2 μL of KAPA polymerase mix  
562 (Illumina), 4.4 μL each of the 5 μM column and row indexing primers, and 2.5 μL of  
563 tagmented DNA. The thermocycler settings were as follows: preincubation (3 min, 72  
564 °C), polymerase activation (5 min, 98 °C), 13 amplification cycles (denaturation at 98 °C  
565 for 10 sec, annealing at 62°C for 30 sec, and extension at 72°C for 30 sec), and  
566 termination (5 min, 72 °C).

567 To determine which starting DNA concentrations yielded the best fragment size,  
568 3.75  $\mu$ L of each amplified sample was mixed with 4  $\mu$ L of 6x loading dye and run on a  
569 1.5% agarose gel at 110 V. The sample with an average length closest to 500 bp was  
570 chosen for each strain. Those samples were then cleaned as recommended by Illumina,  
571 except that we started with 15  $\mu$ L of amplified tagmented DNA and 12  $\mu$ L of AMPure XP  
572 beads. The concentrations of the resulting DNA samples were estimated via Qubit  
573 Fluorometric Quantification (Thermo Fisher Scientific) following the manufacturer's  
574 instructions. The DNA was then diluted to 1 ng/ $\mu$ L and pooled, and a portion of it was  
575 submitted to the Harvard Biopolymer's Facility for TapeStation and qPCR quality control  
576 analysis. Upon passing the quality control step, the DNA was prepared and loaded into  
577 the sequencing cartridge as directed by the MiSeq Reagent Kit v3 with 150 cycles  
578 (Illumina), including a 1% PhiX control spike-in prepared according to manufacturer's  
579 instructions (PhiX Control v3, Illumina), and paired-end sequenced using a MiSeq  
580 instrument.

581 Genomic data was then analyzed to find SNPs, insertions, and deletions.  
582 MetaPhlan2 was used to verify that the DNA was not contaminated. Sequences were  
583 then aligned to the appropriate NCBI reference genome using the Burrow-Wheels  
584 Aligner (BWA-MEM, v7.12) with default settings [82]. Note that NCTC 8325 was used  
585 for HG003, as the HG003 genome on NCBI is not closed. Duplicate reads were marked  
586 with Picard, and Pilon (v1.16) was used for variant calling, with a minimum depth of  
587 1/10<sup>th</sup> of the average read depth and a minimum mapping quality of 30, unless the  
588 average read depth was less than 100, in which case the minimum mapping quality was  
589 set to 15 [83, 84]. The resulting VCF files were then evaluated for mutations in relevant

590 areas of the genome (*i.e.* the LTA pathway or known *ltaS* suppressors). We compared  
591 the predicted protein sequences for LTA pathway members and *ltaS* suppressors in the  
592 five strains using the online Clustal Omega tool from EMBL-EBI [85].

593

## 594 **Gene deletion and complementation**

595

596 To make an anhydrotetracycline (Atet) inducible construct of *ugtP*, a fragment  
597 containing the *ugtP* and *ltaA* operon (SAOUHSC\_00953-00952) and its ribosomal  
598 binding site was amplified from HG003 genomic DNA using *ugtP*-F and *ugtP*-R. The  
599 fragment was then cloned into pTP63 using KpnI and EcoRI to generate pTP63-*ugtP*,  
600 and the pTP63-*ugtP* was transformed into a wildtype RN4220 strain containing pTP44  
601 [86]. Next, the integrated inducible *ugtP* operon was transduced into wildtype HG003,  
602 MW2, and USA300-TCH1516 using  $\phi$ 11 phage to generate HG003-P<sub>Atet</sub>-*ugtP*, MW2-  
603 P<sub>Atet</sub>-*ugtP*, and USA300-TCH1516-P<sub>Atet</sub>-*ugtP*. To generate inducible *ugtP* strains, the  
604 wildtype P<sub>Atet</sub>-*ugtP* strains were grown in TSB containing 0.3  $\mu$ M Atet for 6 hours at  
605 30°C, after which they were transduced with a transposon-inactivated *ugtP* marked with  
606 an erythromycin resistance gene [13]. The desired mutants were selected on TSB agar  
607 containing 5  $\mu$ g/mL erythromycin and 0.3  $\mu$ M Atet and confirmed by PCR using the  
608 primers *ugtP*-CA and *ugtP*-CB.

609 To construct an Atet-inducible *ltaA* construct, the *ltaA* gene (SAOUHSC\_00952)  
610 and the *ugtP*-*ltaA* operon ribosome binding site were amplified from HG003 genomic  
611 DNA using primers *ltaA*-F and *ugtP*-R and cloned into pTP63 to generate pTP63-*ltaA*.  
612 As described above, the pTP63-*ltaA* was transduced into wildtype HG003 and MW2,

613 and the resulting strains were then transduced with a  $\Delta ltaA$  construct marked with a  
614 kanamycin resistance gene to generate the inducible *ltaA* strains [87].

615 To construct an Atet-inducible *ltaS* construct, the *ltaS* gene and its ribosome  
616 binding site were PCR amplified using the primers *ltaS*-F and *ltaS*-R and cloned into  
617 pTP63 to make pTP63-*ltaS*. To make an inducible *ltaS* strain, pTP63-*ltaS* and then a  
618  $\Delta ltaS$  construct marked with an erythromycin resistance gene were transduced into  
619 wildtype HG003, MW2, and USA300-TCH1516 as described above [37]. The *ltaS*  
620 mutants were confirmed by PCR using the primers *ltaS*-CA and *ltaS*-CB.

621

## 622 **Spot dilution assays**

623

624 Overnight cultures of the relevant strains were grown in TSB at 30°C until mid-log  
625 phase and diluted to an OD<sub>600</sub> of 0.1. Five 10-fold dilutions of the resulting cultures were  
626 prepared, and 5  $\mu$ L of each dilution was spotted on TSB plates with or without 0.3  $\mu$ M  
627 Atet and, where indicated, 2.5  $\mu$ g/mL daptomycin. Plates were imaged after  
628 approximately 16 hours of incubation. For the *ltaS* experiments, plates were incubated  
629 at 30°C, 37°C, and 42°C. For the *ltaA* experiments, plates were incubated at 37°C.

630

## 631 **LTA western blot**

632

633 LTAs from MW2, MW2-P<sub>Atet</sub>-*ltaS*, and 4S5, a strain derived from RN4220 known  
634 to not produce LTAs [37], were isolated and detected via western blot using a procedure  
635 similar to that previously described [88]. Overnight cultures of each strain were grown

636 shaking at 30°C in TSB supplemented with 7.5% salt, with the MW2-P<sub>Atet</sub>-*ltaS* grown  
637 both in the presence and absence of 0.4 µM Atet. Cultures were then diluted 1:50 in the  
638 same medium and incubated shaking at 30°C until the OD<sub>600</sub> was between 0.6 and 0.75.  
639 The equivalent of 1 mL of OD<sub>600</sub> 0.8 was then harvested from each sample by  
640 centrifuging at 8000 x g for three minutes. The cell pellets were resuspended in 50 µL of  
641 a buffer composed of 50 mM Tris pH 7.5, 150 mM NaCl, and 200 µg/mL lysostaphin.  
642 Samples were incubated at 37°C for ten minutes. Then, 50 µL of 4x SDS-PAGE loading  
643 buffer was added and the samples were boiled for thirty minutes. After returning the  
644 samples to room temperature, 100 µL water and 0.5 µL of proteinase K (New England  
645 Biolabs) was added to each sample, and samples were then incubated at 50°C for two  
646 hours. After cooling samples to room temperature, 2 µL of AEBSF was added to each  
647 sample to quench the proteinase K. Ten microliters of each sample and 5 µL of  
648 Precision Plus Protein Dual Xtra standard (BioRad) were loaded onto a 4-20% TGX  
649 precast gel (BioRad) and the gel was run for 30 minutes at 200 V using a running buffer  
650 that was 0.5% Tris, 1.5% glycine, and 0.1% SDS. Proteins were transferred to a  
651 methanol-activated PVDF membrane using a TransBlot Turbo (BioRad) via the pre-  
652 installed mixed molecular weight setting. The membrane was rinsed with TBST (0.05%  
653 Tween-20) and incubated rocking overnight at 4°C in 5% milk in TBST to block. After  
654 washing the membrane with TBST three times for five minutes each, the LTAs were  
655 bound with a 1:750 solution of a mouse anti-LTA antibody (Hycult Biotech) in TBST for  
656 45 min. The membrane was then washed an additional three times for five minutes  
657 each before incubating in a 1:2000 dilution of anti-mouse horseradish peroxidase  
658 conjugated antibody (Cell Signaling Technologies) in TBST. The membrane was

659 washed a final five times for five minutes each and then exposed to ECL western  
660 blotting substrate (Pierce). The membrane was imaged on a FluoroChem R gel doc  
661 (ProteinSimple) with a 2 min 40 second exposure for luminescence to detect the LTAs  
662 and automatic exposure for red and green fluorescence channels to detect the protein  
663 standard.

664

## 665 **Acknowledgements**

666

667 We thank David Hooper (Massachusetts General Hospital) for providing the  
668 MW2 strain, Samir Moussa (Harvard Medical School) for creating the pWV01-C9  
669 plasmid with chloramphenicol resistance, Mohamad Sater (Harvard T.H. Chan School  
670 of Public Health) for guidance in aligning and annotating whole genome sequences, and  
671 Scott Olesen (Harvard T.H. Chan School of Public Health) for productive conversations  
672 regarding the statistical analysis of transposon sequencing data.

673

## 674 **References**

675

- 676 1. Centers for Disease Control and Prevention (CDC). Antibiotic / antimicrobial  
677 resistance (AR / AMR) 2018 [updated September 10, 2018; cited 2018 December 21].  
678 Available from: <https://www.cdc.gov/drugresistance/about.html>.
- 679 2. Centers for Disease Control and Prevention (CDC). Antibiotic resistance threats  
680 in the United States, 2013. 2013.
- 681 3. World Health Organization. Prioritization of pathogens to guide discovery,  
682 research and development of new antibiotics for drug-resistant bacterial infections,  
683 including tuberculosis. Geneva: 2017.

- 684 4. Monegro AF, Regunath H. Hospital acquired infections. StatPearls [Internet]:  
685 StatPearls Publishing; 2017.
- 686 5. Spagnolo AM, Orlando P, Panatto D, Amicizia D, Perdelli F, Cristina ML.  
687 *Staphylococcus aureus* with reduced susceptibility to vancomycin in healthcare settings.  
688 Journal of Preventive Medicine and Hygiene. 2014;55(4):137.
- 689 6. Stefani S, Campanile F, Santagati M, Mezzatesta ML, Cafiso V, Pacini G.  
690 Insights and clinical perspectives of daptomycin resistance in *Staphylococcus aureus*: a  
691 review of the available evidence. International journal of antimicrobial agents.  
692 2015;46(3):278-89.
- 693 7. Decousser J-W, Desroches M, Bourgeois-Nicolaos N, Potier J, Jehl F, Lina G, et  
694 al. Susceptibility trends including emergence of linezolid resistance among coagulase-  
695 negative staphylococci and meticillin-resistant *Staphylococcus aureus* from invasive  
696 infections. International journal of antimicrobial agents. 2015;46(6):622-30.
- 697 8. Planet PJ, Narechania A, Chen L, Mathema B, Boundy S, Archer G, et al.  
698 Architecture of a species: phylogenomics of *Staphylococcus aureus*. Trends in  
699 Microbiology. 2017;25(2):153-66.
- 700 9. Bosi E, Monk JM, Aziz RK, Fondi M, Nizet V, Palsson BO. Comparative genome-  
701 scale modelling of *Staphylococcus aureus* strains identifies strain-specific metabolic  
702 capabilities linked to pathogenicity. Proceedings of the National Academy of Sciences.  
703 2016;113(26):E3801-9. doi: 10.1073/pnas.1523199113. PubMed PMID: 27286824;  
704 PubMed Central PMCID: PMC4932939.
- 705 10. van Opijnen T, Bodi KL, Camilli A. Tn-seq: high-throughput parallel sequencing  
706 for fitness and genetic interaction studies in microorganisms. Nature Methods.  
707 2009;6(10):767.
- 708 11. Goodman AL, McNulty NP, Zhao Y, Leip D, Mitra RD, Lozupone CA, et al.  
709 Identifying genetic determinants needed to establish a human gut symbiont in its  
710 habitat. Cell Host & Microbe. 2009;6(3):279-89.
- 711 12. Chaudhuri RR, Allen AG, Owen PJ, Shalom G, Stone K, Harrison M, et al.  
712 Comprehensive identification of essential *Staphylococcus aureus* genes using  
713 Transposon-Mediated Differential Hybridisation (TMDH). BMC Genomics.  
714 2009;10(1):291.
- 715 13. Fey PD, Endres JL, Yajjala VK, Widhelm TJ, Boissy RJ, Bose JL, et al. A genetic  
716 resource for rapid and comprehensive phenotype screening of nonessential  
717 *Staphylococcus aureus* genes. MBio. 2013;4(1):e00537-12.
- 718 14. Bae T, Banger AK, Wallace A, Glass EM, Aslund F, Schneewind O, et al.  
719 *Staphylococcus aureus* virulence genes identified by *bursa aurealis* mutagenesis and  
720 nematode killing. Proceedings of the National Academy of Sciences.

- 721 2004;101(33):12312-7. doi: 10.1073/pnas.0404728101. PubMed PMID: 15304642;  
722 PubMed Central PMCID: PMC514475.
- 723 15. Christiansen MT, Kaas RS, Chaudhuri RR, Holmes MA, Hasman H, Aarestrup  
724 FM. Genome-wide high-throughput screening to investigate essential genes involved in  
725 methicillin-resistant *Staphylococcus aureus* sequence type 398 survival. PLOS ONE.  
726 2014;9(2):e89018.
- 727 16. Valentino MD, Foulston L, Sadaka A, Kos VN, Villet RA, Santa Maria J, et al.  
728 Genes contributing to *Staphylococcus aureus* fitness in abscess- and infection-related  
729 ecologies. mBio. 2014;5(5):e01729-14.
- 730 17. Santiago M, Matano LM, Moussa SH, Gilmore MS, Walker S, Meredith TC. A  
731 new platform for ultra-high density *Staphylococcus aureus* transposon libraries. BMC  
732 Genomics. 2015;16:252. doi: 10.1186/s12864-015-1361-3. PubMed PMID: 25888466;  
733 PubMed Central PMCID: PMC4389836.
- 734 18. Carey AF, Rock JM, Krieger IV, Chase MR, Fernandez-Suarez M, Gagneux S, et al.  
735 TnSeq of *Mycobacterium tuberculosis* clinical isolates reveals strain-specific  
736 antibiotic liabilities. PLOS Pathogens. 2018;14(3):e1006939.
- 737 19. Santiago M, Lee W, Fayad AA, Coe KA, Rajagopal M, Do T, et al. Genome-wide  
738 mutant profiling predicts the mechanism of a Lipid II binding antibiotic. Nature Chemical  
739 Biology. 2018;14(6):601-8. doi: 10.1038/s41589-018-0041-4. PubMed PMID: 29662210;  
740 PubMed Central PMCID: PMC5964011.
- 741 20. Baba T, Takeuchi F, Kuroda M, Yuzawa H, Aoki K-i, Oguchi A, et al. Genome  
742 and virulence determinants of high virulence community-acquired MRSA. The Lancet.  
743 2002;359(9320):1819-27.
- 744 21. Chambers HF, DeLeo FR. Waves of resistance: *Staphylococcus aureus* in the  
745 antibiotic era. Nature Reviews Microbiology. 2009;7(9):629.
- 746 22. Centers for Disease Control and Prevention (CDC). Four pediatric deaths from  
747 community-acquired methicillin-resistant *Staphylococcus aureus*—Minnesota and North  
748 Dakota, 1997-1999. Morbidity and Mortality Weekly Report. 1999;48(32):707.
- 749 23. Holden MT, Feil EJ, Lindsay JA, Peacock SJ, Day NP, Enright MC, et al.  
750 Complete genomes of two clinical *Staphylococcus aureus* strains: evidence for the rapid  
751 evolution of virulence and drug resistance. Proceedings of the National Academy of  
752 Sciences. 2004;101(26):9786-91.
- 753 24. Highlander SK, Hultén KG, Qin X, Jiang H, Yerrapragada S, Mason EO, et al.  
754 Subtle genetic changes enhance virulence of methicillin resistant and sensitive  
755 *Staphylococcus aureus*. BMC Microbiology. 2007;7(1):1.
- 756 25. Kennedy AD, Otto M, Braughton KR, Whitney AR, Chen L, Mathema B, et al.  
757 Epidemic community-associated methicillin-resistant *Staphylococcus aureus*: recent



- 758 clonal expansion and diversification. Proceedings of the National Academy of Sciences.  
759 2008;105(4):1327-32.
- 760 26. van Opijnen T, Dedrick S, Bento J. Strain dependent genetic networks for  
761 antibiotic-sensitivity in a bacterial pathogen with a large pan-genome. PLOS Pathogens.  
762 2016;12(9):e1005869. doi: 10.1371/journal.ppat.1005869. PubMed PMID: 27607357;  
763 PubMed Central PMCID: PMC5015961.
- 764 27. Connelly JC, De Leau ES, Leach DR. DNA cleavage and degradation by the  
765 SbcCD protein complex from *Escherichia coli*. Nucleic Acids Research.  
766 1999;27(4):1039-46.
- 767 28. Connelly JC, Kirkham LA, Leach DR. The SbcCD nuclease of *Escherichia coli* is  
768 a structural maintenance of chromosomes (SMC) family protein that cleaves hairpin  
769 DNA. Proceedings of the National Academy of Sciences. 1998;95(14):7969-74.
- 770 29. Wheeler R, Turner RD, Bailey RG, Salamaga B, Mesnage S, Mohamad SA, et al.  
771 Bacterial cell enlargement requires control of cell wall stiffness mediated by  
772 peptidoglycan hydrolases. mBio. 2015;6(4):e00660-15.
- 773 30. Holland LM, O'donnell ST, Ryjenkov DA, Gomelsky L, Slater SR, Fey PD, et al. A  
774 staphylococcal GGDEF domain protein regulates biofilm formation independently of  
775 cyclic dimeric GMP. Journal of Bacteriology. 2008;190(15):5178-89.
- 776 31. Pasquina LW, Santa Maria JP, Walker S. Teichoic acid biosynthesis as an  
777 antibiotic target. Current Opinion in Microbiology. 2013;16(5):531-7.
- 778 32. Kho K, Meredith TC. Salt-induced stress stimulates a lipoteichoic acid-specific  
779 three-component glycosylation system in *Staphylococcus aureus*. Journal of  
780 Bacteriology. 2018;200(12):e00017-18.
- 781 33. Neuhaus FC, Baddiley J. A continuum of anionic charge: structures and functions  
782 of D-alanyl-teichoic acids in Gram-positive bacteria. Microbiology Molecular Biology  
783 Reviews. 2003;67(4):686-723.
- 784 34. Gründling A, Schneewind O. Genes required for glycolipid synthesis and  
785 lipoteichoic acid anchoring in *Staphylococcus aureus*. Journal of Bacteriology.  
786 2007;189(6):2521-30.
- 787 35. Gründling A, Schneewind O. Synthesis of glycerol phosphate lipoteichoic acid in  
788 *Staphylococcus aureus*. Proceedings of the National Academy of Sciences.  
789 2007;104(20):8478-83.
- 790 36. Kiriukhin MY, Debabov DV, Shinabarger DL, Neuhaus FC. Biosynthesis of the  
791 glycolipid anchor in lipoteichoic acid of *Staphylococcus aureus* RN4220: role of YpfP,  
792 the diglucosyldiacylglycerol synthase. Journal of Bacteriology. 2001;183(11):3506-14.

- 793 37. Corrigan RM, Abbott JC, Burhenne H, Kaefer V, Gründling A. c-di-AMP is a new  
794 second messenger in *Staphylococcus aureus* with a role in controlling cell size and  
795 envelope stress. PLOS Pathogens. 2011;7(9):e1002217.
- 796 38. Bæk KT, Bowman L, Millership C, Søgaard MD, Kaefer V, Siljamäki P, et al. The  
797 cell wall polymer lipoteichoic acid becomes nonessential in *Staphylococcus aureus* cells  
798 lacking the ClpX chaperone. MBio. 2016;7(4):e01228-16.
- 799 39. Karinou E, Schuster CF, Pazos M, Vollmer W, Gründling A. Inactivation of the  
800 monofunctional peptidoglycan glycosyltransferase SgtB allows *Staphylococcus aureus*  
801 to survive in the absence of lipoteichoic acid. Journal of Bacteriology. 2018. doi:  
802 10.1128/jb.00574-18.
- 803 40. Oku Y, Kurokawa K, Matsuo M, Yamada S, Lee B-L, Sekimizu K. Pleiotropic  
804 roles of polyglycerolphosphate synthase of lipoteichoic acid in growth of *Staphylococcus*  
805 *aureus* cells. Journal of Bacteriology. 2009;191(1):141-51.
- 806 41. Eliopoulos GM, Thauvin C, Gerson B, Moellering R. *In vitro* activity and  
807 mechanism of action of A21978C1, a novel cyclic lipopeptide antibiotic. Antimicrobial  
808 Agents and Chemotherapy. 1985;27(3):357-62.
- 809 42. Pogliano J, Pogliano N, Silverman JA. Daptomycin-mediated reorganization of  
810 membrane architecture causes mislocalization of essential cell division proteins. Journal  
811 of Bacteriology. 2012;194(17):4494-504.
- 812 43. Alborn W, Allen N, Preston D. Daptomycin disrupts membrane potential in  
813 growing *Staphylococcus aureus*. Antimicrobial Agents and Chemotherapy.  
814 1991;35(11):2282-7.
- 815 44. Lakey JH, Ptak M. Fluorescence indicates a calcium-dependent interaction  
816 between the lipopeptide antibiotic LY 146032 and phospholipid membranes.  
817 Biochemistry. 1988;27(13):4639-45.
- 818 45. Silverman JA, Perlmutter NG, Shapiro HM. Correlation of daptomycin bactericidal  
819 activity and membrane depolarization in *Staphylococcus aureus*. Antimicrobial Agents  
820 and Chemotherapy. 2003;47(8):2538-44.
- 821 46. Müller A, Wenzel M, Strahl H, Grein F, Saaki TN, Kohl B, et al. Daptomycin  
822 inhibits cell envelope synthesis by interfering with fluid membrane microdomains.  
823 Proceedings of the National Academy of Sciences. 2016;113(45):E7077-E86.
- 824 47. Heidary M, Khosravi AD, Khoshnood S, Nasiri MJ, Soleimani S, Goudarzi M.  
825 Daptomycin. Journal of Antimicrobial Chemotherapy. 2018;73(1):1-11. doi:  
826 10.1093/jac/dkx349.
- 827 48. Falord M, Karimova G, Hiron A, Msadek T. GraXSR proteins interact with the  
828 VraFG ABC transporter to form a five-component system required for cationic

- 829 antimicrobial peptide sensing and resistance in *Staphylococcus aureus*. *Antimicrobial*  
830 *Agents and Chemotherapy*. 2012;56(2):1047-58.
- 831 49. Meehl M, Herbert S, Gotz F, Cheung A. Interaction of the GraRS two-component  
832 system with the *VraFG* ABC transporter to support vancomycin-intermediate resistance  
833 in *Staphylococcus aureus*. *Antimicrobial Agents and Chemotherapy*. 2007;51(8):2679-  
834 89. doi: 10.1128/AAC.00209-07. PubMed PMID: 17502406; PubMed Central PMCID:  
835 PMC1932546.
- 836 50. Cui L, Lian J-Q, Neoh H-m, Reyes E, Hiramatsu K. DNA microarray-based  
837 identification of genes associated with glycopeptide resistance in *Staphylococcus*  
838 *aureus*. *Antimicrobial Agents and Chemotherapy*. 2005;49(8):3404-13.
- 839 51. Fournier B, Hooper DC. A new two-component regulatory system involved in  
840 adhesion, autolysis, and extracellular proteolytic activity of *Staphylococcus aureus*.  
841 *Journal of Bacteriology*. 2000;182(14):3955-64.
- 842 52. Fournier B, Klier A, Rapoport G. The two-component system *ArlS*–*ArlR* is a  
843 regulator of virulence gene expression in *Staphylococcus aureus*. *Molecular*  
844 *Microbiology*. 2001;41(1):247-61.
- 845 53. Bugg T, Walsh C. Intracellular steps of bacterial cell wall peptidoglycan  
846 biosynthesis: enzymology, antibiotics, and antibiotic resistance. *Natural Product*  
847 *Reports*. 1992;9(3):199-215.
- 848 54. Blake KL, O'Neill AJ, Mengin-Lecreux D, Henderson PJ, Bostock JM, Dunsmore  
849 CJ, et al. The nature of *Staphylococcus aureus* *MurA* and *MurZ* and approaches for  
850 detection of peptidoglycan biosynthesis inhibitors. *Molecular Microbiology*.  
851 2009;72(2):335-43.
- 852 55. Kullik I, Jenni R, Berger-Bächi B. Sequence of the putative alanine racemase  
853 operon in *Staphylococcus aureus*: insertional interruption of this operon reduces D-  
854 alanine substitution of lipoteichoic acid and autolysis. *Gene*. 1998;219(1-2):9-17.
- 855 56. Peschel A, Jack RW, Otto M, Collins LV, Staubitz P, Nicholson G, et al.  
856 *Staphylococcus aureus* resistance to human defensins and evasion of neutrophil killing  
857 via the novel virulence factor *MprF* is based on modification of membrane lipids with L-  
858 lysine. *Journal of Experimental Medicine*. 2001;193(9):1067-76.
- 859 57. Eswara PJ, Brzozowski RS, Viola MG, Graham G, Spanoudis C, Trebino C, et al.  
860 An essential *Staphylococcus aureus* cell division protein directly regulates *FtsZ*  
861 dynamics. *eLife*. 2018;7:e38856.
- 862 58. Steele VR, Bottomley AL, Garcia-Lara J, Kasturiarachchi J, Foster SJ. Multiple  
863 essential roles for *EzrA* in cell division of *Staphylococcus aureus*. *Molecular*  
864 *Microbiology*. 2011;80(2):542-55.

- 865 59. Pang T, Wang X, Lim HC, Bernhardt TG, Rudner DZ. The nucleoid occlusion  
866 factor Noc controls DNA replication initiation in *Staphylococcus aureus*. PLOS Genetics.  
867 2017;13(7):e1006908.
- 868 60. Bayer AS, Mishra NN, Cheung AL, Rubio A, Yang S-J. Dysregulation of *mprF*  
869 and *dltABCD* expression among daptomycin-non-susceptible MRSA clinical isolates.  
870 Journal of Antimicrobial Chemotherapy. 2016;71(8):2100-4.
- 871 61. Yang S-J, Mishra NN, Rubio A, Bayer AS. Causal role of single nucleotide  
872 polymorphisms (SNPs) within the *mprF* gene of *Staphylococcus aureus* in daptomycin  
873 resistance. Antimicrobial Agents and Chemotherapy. 2013:AAC. 01184-13.
- 874 62. Neoh HM, Cui L, Yuzawa H, Takeuchi F, Matsuo M, Hiramatsu K. Mutated  
875 response regulator *graR* is responsible for phenotypic conversion of *Staphylococcus*  
876 *aureus* from heterogeneous vancomycin-intermediate resistance to vancomycin-  
877 intermediate resistance. Antimicrobial Agents and Chemotherapy. 2008;52(1):45-53.  
878 doi: 10.1128/AAC.00534-07. PubMed PMID: 17954695; PubMed Central PMCID:  
879 PMC2223914.
- 880 63. Blake KL, O'Neill AJ. Transposon library screening for identification of genetic  
881 loci participating in intrinsic susceptibility and acquired resistance to antistaphylococcal  
882 agents. Journal of Antimicrobial Chemotherapy. 2013;68(1):12-6. doi:  
883 10.1093/jac/dks373. PubMed PMID: 23045225.
- 884 64. Humphries RM, Pollett S, Sakoulas G. A current perspective on daptomycin for  
885 the clinical microbiologist. Clinical Microbiology Reviews. 2013;26(4):759-80.
- 886 65. Cafiso V, Bertuccio T, Purrello S, Campanile F, Mammina C, Sartor A, et al. *dltA*  
887 overexpression: A strain-independent keystone of daptomycin resistance in methicillin-  
888 resistant *Staphylococcus aureus*. International journal of antimicrobial agents.  
889 2014;43(1):26-31. doi: 10.1016/j.ijantimicag.2013.10.001. PubMed PMID: 24183798.
- 890 66. Mishra NN, Liu GY, Yeaman MR, Nast CC, Proctor RA, McKinnell J, et al.  
891 Carotenoid-related alteration of cell membrane fluidity impacts *Staphylococcus aureus*  
892 susceptibility to host defense peptides. Antimicrobial Agents and Chemotherapy.  
893 2011;55(2):526-31. doi: 10.1128/AAC.00680-10. PubMed PMID: 21115796; PubMed  
894 Central PMCID: PMC3028772.
- 895 67. Friedman L, Alder JD, Silverman JA. Genetic changes that correlate with  
896 reduced susceptibility to daptomycin in *Staphylococcus aureus*. Antimicrobial Agents  
897 and Chemotherapy. 2006;50(6):2137-45. doi: 10.1128/AAC.00039-06. PubMed PMID:  
898 PMC1479123.
- 899 68. Tran TT, Munita JM, Arias CA. Mechanisms of drug resistance: daptomycin  
900 resistance. Annals of the New York Academy of Sciences. 2015;1354(1):32-53.

- 901 69. Dhand A, Sakoulas G. Daptomycin in combination with other antibiotics for the  
902 treatment of complicated methicillin-resistant *Staphylococcus aureus* bacteremia.  
903 Clinical Therapeutics. 2014;36(10):1303-16.
- 904 70. Miró JM, Entenza JM, Del Río A, Velasco M, Castañeda X, Garcia de la Mària C,  
905 et al. High-dose daptomycin plus fosfomicin is safe and effective in treating methicillin-  
906 susceptible and methicillin-resistant *Staphylococcus aureus* endocarditis. Antimicrobial  
907 Agents and Chemotherapy. 2012;56(8):4511-5. doi: 10.1128/AAC.06449-11. PubMed  
908 PMID: 22644033; PubMed Central PMCID: PMC3421550.
- 909 71. Shaw Perujo E, Miró Meda JM, Puig-Asensio M, Pigrau C, Barcenilla F, Murillas  
910 J, et al. Daptomycin plus fosfomicin versus daptomycin monotherapy in treating MRSA:  
911 protocol of a multicentre, randomised, phase III trial. BMJ Open. 2015;5(3).
- 912 72. Poulsen BE, Yang R, Clatworthy AE, White T, Osmulski SJ, Li L, et al. Defining  
913 the core essential genome of *Pseudomonas aeruginosa*. Proceedings of the National  
914 Academy of Sciences. 2019:201900570. doi: 10.1073/pnas.1900570116.
- 915 73. Choe D, Szubin R, Dahesh S, Cho S, Nizet V, Palsson B, et al. Genome-scale  
916 analysis of Methicillin-resistant *Staphylococcus aureus* USA300 reveals a tradeoff  
917 between pathogenesis and drug resistance. Science Reports. 2018;8(1):2215. doi:  
918 10.1038/s41598-018-20661-1. PubMed PMID: 29396540; PubMed Central PMCID:  
919 PMCPMC5797083.
- 920 74. Goecks J, Nekrutenko A, Taylor J, Galaxy T. Galaxy: a comprehensive approach  
921 for supporting accessible, reproducible, and transparent computational research in the  
922 life sciences. Genome Biology. 2010;11(8):R86. doi: 10.1186/gb-2010-11-8-r86.  
923 PubMed PMID: 20738864; PubMed Central PMCID: PMC2945788.
- 924 75. Afgan E, Baker D, Batut B, van den Beek M, Bouvier D, Cech M, et al. The  
925 Galaxy platform for accessible, reproducible and collaborative biomedical analyses:  
926 2018 update. Nucleic Acids Research. 2018;46(W1):W537-W44. doi:  
927 10.1093/nar/gky379. PubMed PMID: 29790989; PubMed Central PMCID:  
928 PMC6030816.
- 929 76. Seemann T. Prokka: rapid prokaryotic genome annotation. Bioinformatics.  
930 2014;30(14):2068-9. doi: 10.1093/bioinformatics/btu153. PubMed PMID: 24642063.
- 931 77. Page AJ, Cummins CA, Hunt M, Wong VK, Reuter S, Holden MT, et al. Roary:  
932 rapid large-scale prokaryote pan genome analysis. Bioinformatics. 2015;31(22):3691-3.  
933 doi: 10.1093/bioinformatics/btv421. PubMed PMID: 26198102; PubMed Central PMCID:  
934 PMC4817141.
- 935 78. Bernhardt J, Fuchs S, Mäder U, Mehlan H, Michalik S, Otto A, et al. AureoWiki  
936 2018. Available from: [http://aureowiki.med.uni-greifswald.de/Main\\_Page](http://aureowiki.med.uni-greifswald.de/Main_Page).
- 937 79. DeJesus MA, Ambadipudi C, Baker R, Sasseti C, Ioerger TR. TRANSIT - a  
938 software tool for Himar1 TnSeq analysis. PLOS Computational Biology.

- 939 2015;11(10):e1004401. doi: 10.1371/journal.pcbi.1004401. PubMed PMID: 26447887;  
940 PubMed Central PMCID: PMC4598096.
- 941 80. Mi H, Huang X, Muruganujan A, Tang H, Mills C, Kang D, et al. PANTHER  
942 version 11: expanded annotation data from Gene Ontology and Reactome pathways,  
943 and data analysis tool enhancements. *Nucleic Acids Research*. 2016;45(D1):D183-D9.
- 944 81. Gama-Castro S, Salgado H, Santos-Zavaleta A, Ledezma-Tejeida D, Muniz-  
945 Rascado L, Garcia-Sotelo JS, et al. RegulonDB version 9.0: high-level integration of  
946 gene regulation, coexpression, motif clustering and beyond. *Nucleic Acids Research*.  
947 2016;44(D1):D133-43. doi: 10.1093/nar/gkv1156. PubMed PMID: 26527724; PubMed  
948 Central PMCID: PMC4702833.
- 949 82. Li H, Durbin R. Fast and accurate short read alignment with Burrows–Wheeler  
950 transform. *Bioinformatics*. 2009;25(14):1754-60.
- 951 83. The Broad Institute. Picard Tools [cited 2018]. Available from:  
952 <http://broadinstitute.github.io/picard>.
- 953 84. Walker BJ, Abeel T, Shea T, Priest M, Abouelliel A, Sakthikumar S, et al. Pilon:  
954 an integrated tool for comprehensive microbial variant detection and genome assembly  
955 improvement. *PLOS ONE*. 2014;9(11):e112963.
- 956 85. Chojnacki S, Cowley A, Lee J, Foix A, Lopez R. Programmatic access to  
957 bioinformatics tools from EMBL-EBI update: 2017. *Nucleic Acids Research*.  
958 2017;45(W1):W550-W3.
- 959 86. Pasquina L, Santa Maria JP, Jr., McKay Wood B, Moussa SH, Matano LM,  
960 Santiago M, et al. A synthetic lethal approach for compound and target identification in  
961 *Staphylococcus aureus*. *Nature Chemical Biology*. 2016;12(1):40-5. doi:  
962 10.1038/nchembio.1967. PubMed PMID: 26619249; PubMed Central PMCID:  
963 PMC4684722.
- 964 87. Lee W, Do T, Zhang G, Kahne D, Meredith TC, Walker S. Antibiotic combinations  
965 that enable one-step, targeted mutagenesis of chromosomal genes. *ACS Infectious*  
966 *Diseases*. 2018;4(6):1007-18.
- 967 88. Vickery CR, Wood BM, Morris HG, Losick R, Walker S. Reconstitution of  
968 *Staphylococcus aureus* lipoteichoic acid synthase activity identifies Congo red as a  
969 selective inhibitor. *Journal of the American Chemical Society*. 2018;140(3):876-9.

970

## 971 **Figure captions**

972

973 **Fig 1. We created complex transposon libraries of similar coverage in five diverse**  
974 ***S. aureus* strains.**

975 (A) Six barcoded transposon constructs were used to make sub-libraries that were  
976 combined into a single transposon library. Construct 1 can drive expression only of  
977 *erm<sup>R</sup>* (gene within the transposon constructs). Constructs 2-6 can drive expression of  
978 other genes, either by readthrough of *erm<sup>R</sup>* in constructs lacking terminators or because  
979 they contain an additional outward-facing promoter ( $P_{cap}$ ,  $P_{pen}$ , or  $P_{tuf}$ ). The libraries can  
980 be sequenced to find essential genes that lack transposon insertions (red gene) or  
981 treated with compound and then sequenced to find conditionally essential genes (yellow  
982 gene), upregulation signatures (upstream of yellow gene), and genes with conditional  
983 fitness costs (green gene). (B) High-density transposon libraries were made in five *S.*  
984 *aureus* strains. MSSA = methicillin-sensitive *S. aureus*; MRSA = methicillin-resistant *S.*  
985 *aureus*; ST = sequence type. Sites with insertions refers to the number of TA  
986 dinucleotide sites having insertions of at least one transposon construct. The “unique  
987 insertions” column sums the TA insertion counts from each transposon construct.  
988 Coverage per gene is the average percent of TA sites within a gene with insertions,  $\pm$   
989 standard deviation. Low-coverage genes were defined as those that had less than half  
990 of the average gene coverage.

991

992 **Fig 2. The fitness of lipoteichoic acid pathway mutants varies by strain.**

993 (A) The number of essential genes per strain (horizontal bars) and the number of genes  
994 found to be essential for all three, two, or one of the MRSA strains (vertical bars, with  
995 black dots denoting strains for which the genes are essential). Only MRSA strains were

996 included for simplicity, but a similar plot with the MSSA strains is included in the  
997 supporting information. Note that gene essentiality is functionally defined as a lack of  
998 transposon insertions in a gene, but it may be possible to make knockouts of some of  
999 these genes under favorable conditions. (B) A schematic of the lipoteichoic acid  
1000 pathway in *S. aureus*. (C) The number of reads in each LTA pathway gene for each  
1001 transposon library, expressed as a percentage of the average number of reads per TA  
1002 site in the coding regions of the libraries. There are strain-dependent differences in  
1003 transposon insertions in LTA pathway genes, with USA300-TCH1516 appearing reliant  
1004 on most genes in the pathway while MW2 is insensitive even to inactivation of *ItaS*.  
1005

1006 **Fig 3. The lipoteichoic acid pathway is crucial for fitness of USA300-TCH1516 but**  
1007 **is dispensable in MW2.**

1008 (A) Tn-Seq data for the LTA pathway genes, with sequencing reads from insertions in  
1009 the plus strand in purple and minus strand in teal. The reads were calculated by  
1010 summing two replicate Tn-Seq experiments, only including data from transposon  
1011 constructs that contained a transcriptional terminator. The data were normalized to each  
1012 other by non-zero means normalization prior to plotting. The x-axis is expressed in  
1013 kilobases. The y-axis is expressed on a  $\log_{10}$  scale and is truncated to 500 reads. (B)  
1014 Growth on agar plates for wildtype (WT) and  $\Delta ugtP$  strains confirms that USA300-  
1015 TCH1516 is more sensitive to *ugtP* deletion than MW2 is. (C) Growth on agar plates of  
1016 wildtype and  $\Delta ItaS$  strains confirms that *ItaS* is dispensable in MW2. (D) Western blot of  
1017 LTAs produced by 4S5 (known to not produce LTAs), wildtype MW2, and MW2- $P_{A_{tet}}$ -



1018 *ltaS* confirms that MW2- $P_{Atet}$ -*ltaS* does not produce LTAs unless expression of the  
1019 exogenous copy of *ltaS* is induced.

1020

1021 **Fig 4. Transposon sequencing supports previously reported vulnerabilities in *S.***  
1022 ***aureus* and reveals new ones.**

1023 (A) A comparison of the Tn-Seq hits under daptomycin exposure in five strains of *S.*  
1024 *aureus*. All hits needed to have a q-value less than 0.05. Depleted genes had 10-fold  
1025 fewer reads in the daptomycin-exposed sample compared to the control sample after  
1026 normalization. Upregulated genes had a strand-biased enrichment of reads in the region  
1027 upstream of the gene. The upper graph shows how many strains each hit was found in  
1028 while the lower graph shows how many hits found in each strain were shared with at  
1029 least one other strain and how many were unique to that strain. (B) Genes that were  
1030 depleted of reads under daptomycin exposure in at least three of the transposon  
1031 libraries, using the cutoffs described above. Hypothetical genes are listed according to  
1032 their NCTC 8325 locus tag numbers. Genes meeting all cutoffs in a strain are indicated  
1033 by dark pink. Those that have a significant q-value but are only depleted 5- to 10-fold  
1034 are indicated in light pink. (C) Normalized Tn-Seq reads from daptomycin-exposed  
1035 MSSA476 in RPMI+LB plotted against the reads from the control condition. Genes from  
1036 above that were shared by at least 4 strains are highlighted.

1037

1038 **Fig 5. LTA loss sensitizes *S. aureus* to daptomycin.**

1039 (A) Normalized Tn-Seq reads from daptomycin-exposed HG003 in RPMI+LB plotted  
1040 against the reads from untreated HG003 in the same growth medium. Genes in the LTA

1041 pathway that were significantly depleted are highlighted. (B) Growth on agar plates of  
1042 HG003 wildtype,  $\Delta itaA$ , and inducible *ItaA* complementation strains in the presence or  
1043 absence of daptomycin and the inducer confirms that *ItaA* is required for *S. aureus*  
1044 growth under daptomycin exposure.

1045

## 1046 **Supporting information**

1047

1048 **S1 Fig. Gene essentiality varies by strain.** The number of essential genes per strain  
1049 (horizontal bars) and the number of genes found to be essential for all five or a subset  
1050 of the *S. aureus* strains (vertical bars, with black dots denoting strains for which the  
1051 gene is essential).

1052

1053 **S2 Fig. Tn-Seq data reveals variable dependence on the lipoteichoic acid pathway**  
1054 **among *S. aureus* strains.** Each column of graphs represents a gene in the LTA  
1055 pathway, with rows representing strains. Reads in the Tn-Seq data, expressed on a  
1056  $\log_{10}$  scale, are plotted against the position in the genome indicated on the x-axis with a  
1057 depiction of the gene context underneath each plot. The y-axis is truncated to 500  
1058 reads. Purple lines indicate plus-strand reads. Teal lines indicate minus-strand reads.

1059

1060 **S3 Fig. MW2 $\Delta itaS$  mutants are temperature sensitive.** Growth on agar plates of  
1061 wildtype and *ItaS* complementation strains for HG003, MW2, and USA300-TCH1516  
1062 with and without inducer at 30°C, 37°C, and 42°C.

1063

1064 **S4 Fig. *ItaA* is conditionally essential in USA300-TCH1516 and MW2 in the**  
1065 **presence of daptomycin.** Growth on agar plates of wildtype,  $\Delta$ *ItaA*, and inducible *ItaA*  
1066 complementation strains for MW2 and USA300-TCH1516 in the presence or absence of  
1067 daptomycin and the complementation inducer confirms that *ItaA* is required for *S.*  
1068 *aureus* growth under daptomycin exposure.

1069

1070 **S1 Table. Comparison of essential genes in *S. aureus* strains.** A table of all genes  
1071 that are essential for at least one strain, with essentiality designations for each gene in  
1072 each strain for the TRANSIT Gumbel analysis and the subsequent permutation test  
1073 which was used to determine whether differences between strains seen in the Gumbel  
1074 results were significant. If differences were not significant, essential (E) and  
1075 nonessential (NE) designations were converted to uncertain (U).

1076

1077 **S2 Table. Core essential genes in *S. aureus*.** A list of the genes that were determined  
1078 to be essential in all five *S. aureus* strains.

1079

1080 **S3 Table. Gene ontology analysis reveals central dogma pathways to be**  
1081 **universally essential in *S. aureus*.** Red text highlights those processes mentioned in  
1082 the main text. DNA, RNA, and protein metabolic processes are significantly over-  
1083 represented among the genes essential for all five strains of *S. aureus* studied.  
1084 Phospholipid and monosaccharide synthesis were likewise over-represented, while  
1085 genes of unknown function were under-represented.

1086

1087 **S4 Table. Genes depleted under daptomycin exposure.** A table of the genes that  
1088 were 10-fold depleted of reads in the normalized daptomycin file compared to the  
1089 control file with q-values less than 0.05 and at least 100 reads in the control file.

1090

1091 **S5 Table. Genes upregulated under daptomycin exposure.** A table of the genes that  
1092 had upregulation signatures under daptomycin exposure. See methods for details of  
1093 analysis.

1094

1095 **S6 Table. Genes enriched under daptomycin exposure.** A table of the genes that  
1096 were 10-fold enriched in reads in the normalized daptomycin file compared to the  
1097 control file with q-values less than 0.05 and at least 100 normalized reads in the  
1098 daptomycin file.

1099

1100 **S7 Table. Primers, plasmids, and strains used in this study.**

1101

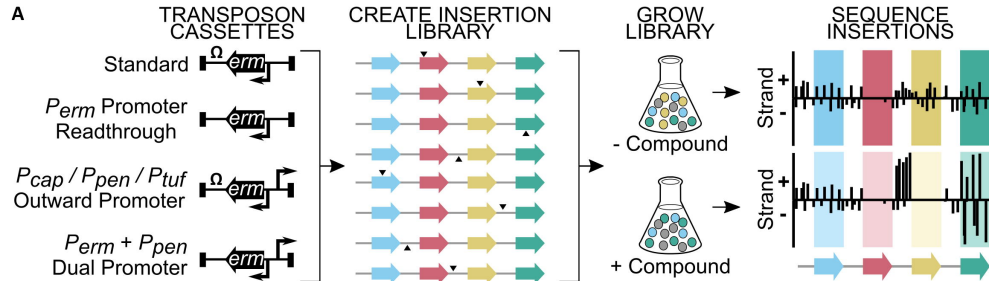

**B**

|         | MSSA/MRSA | Associated Environment | Isolation Location | ST | Sites with Insertions | Unique Insertions | Coverage Per Gene | % Genes with Low Coverage |
|---------|-----------|------------------------|--------------------|----|-----------------------|-------------------|-------------------|---------------------------|
| HG003   | S         | Laboratory             | -                  | 8  | 186,736 69%           | 447,835           | 68 ± 18%          | 9%                        |
| USA300  | R         | Community              | USA                | 8  | 265,871 95%           | 1,193,971         | 88 ± 19%          | 8%                        |
| MSSA476 | S         | Community              | UK                 | 1  | 215,867 81%           | 746,933           | 75 ± 22%          | 12%                       |
| MW2     | R         | Community              | USA                | 1  | 167,322 62%           | 388,101           | 61 ± 16%          | 10%                       |
| MRSA252 | R         | Hospital               | UK                 | 36 | 201,229 72%           | 527,404           | 72 ± 18%          | 9%                        |

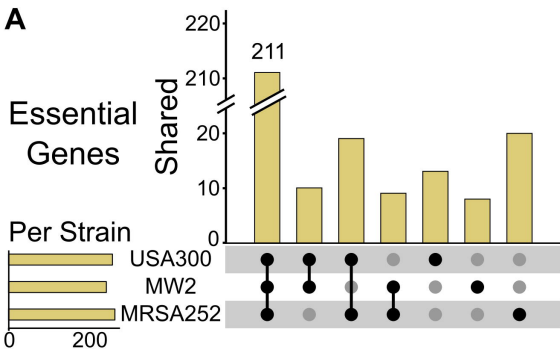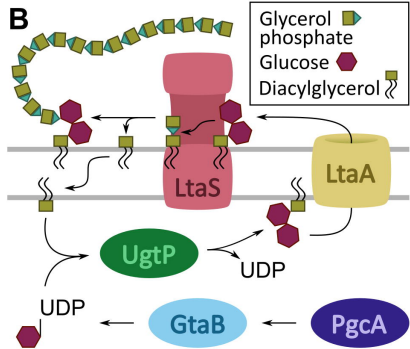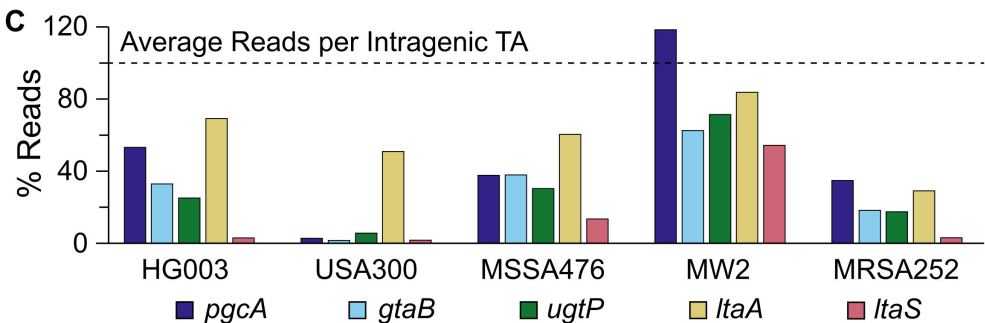

**A**

■ Plus Strand    ■ Minus Strand

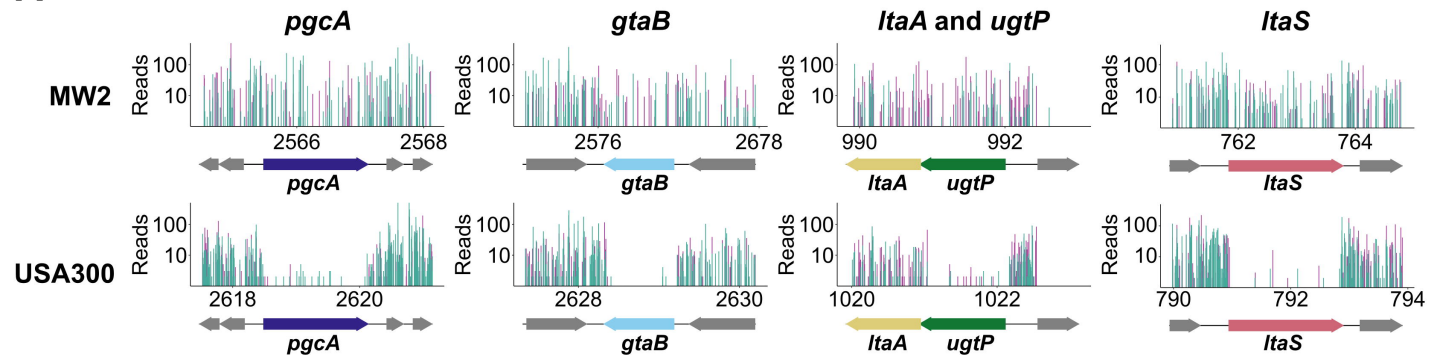**B**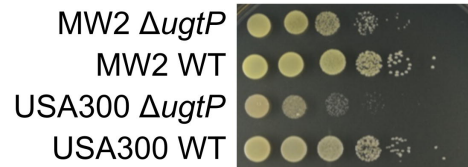**C**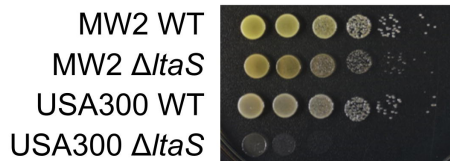**D**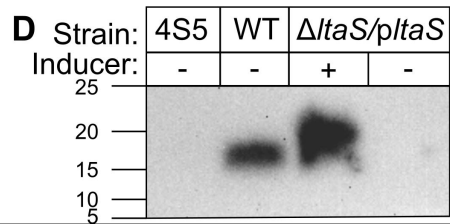

**A Daptomycin Tn-Seq Hits**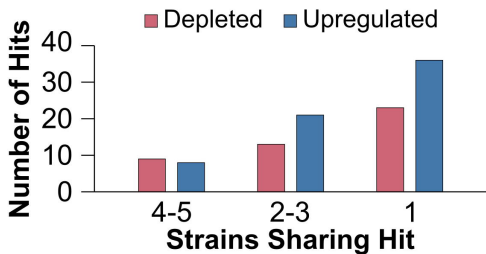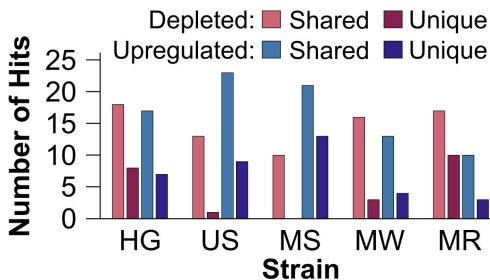**B Shared Depleted Genes**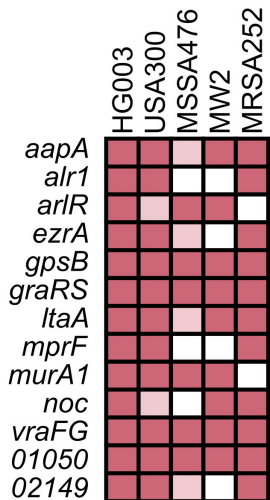**C MSSA476**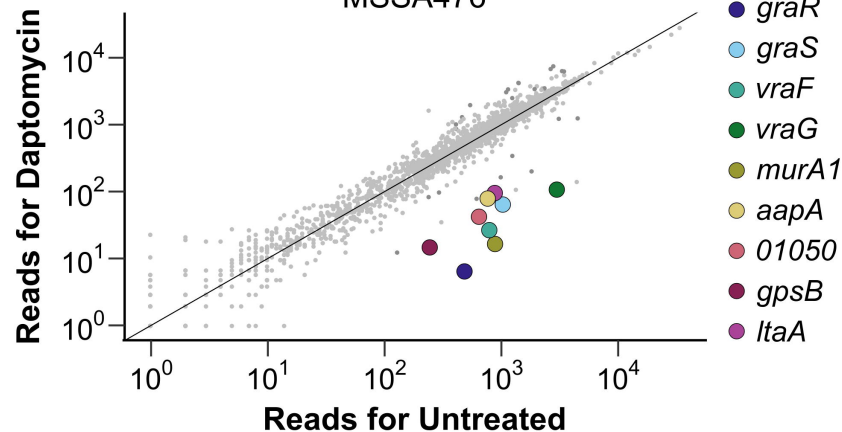



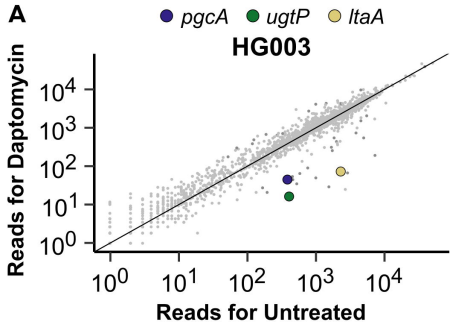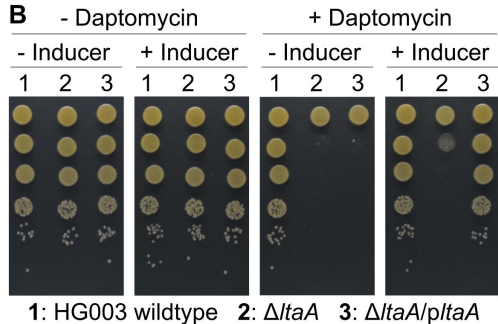

Source: https://www.biorxiv.org/content/biorxiv/early/2019/05/23/648246.1.full.pdf
